# Supplementary material for: Challenges in modeling complexity of neglected tropical diseases: a review of dynamics of visceral leishmaniasis in resource limited settings
Source: Springer Nature journal article supplement (doi:10.1186/s12982-017-0065-3), 2017-09-18
Supplement: MOESM1 [file 15068962]

## Supplementary Document

The process of the literature search as well as inclusion and exclusion of articles.

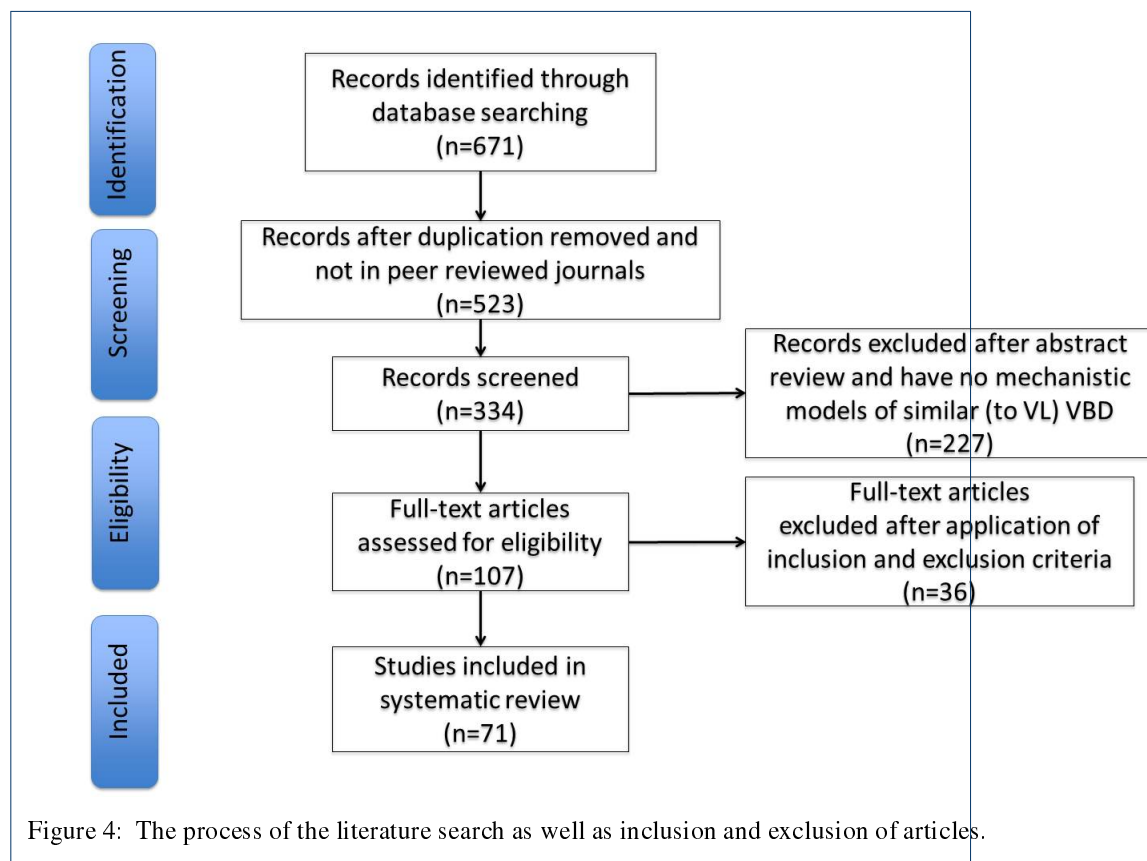

Figure 4: The process of the literature search as well as inclusion and exclusion of articles.
